# Supplementary material for: SARS-CoV-2 Orf9b suppresses type I interferon responses by targeting TOM70
Source: PubMed Central journal article supplement (PMC7387808; doi:10.1038/s41423-020-0514-8), 2020-07-29
Supplement: 41423_2020_514_MOESM1_ESM.pdf [file 41423_2020_514_MOESM1_ESM.pdf]

# Supplementary Information

## SARS-CoV-2 Orf9b Suppresses Type I Interferon Responses by Targeting TOM70

Jiang *et al.*

### Table of contents:

#### Materials and Methods

**Supplementary Figure 1.** Orf9b interacts with TOM70.

**Supplementary Figure 2.** Orf9b localizes on membrane of mitochondria and inhibits type I IFN responses through TOM70.

**Supplementary Table 1.** The identified interacting protein list of SARS-CoV-2 Orf9b.

**Supplementary Table 2.** Detailed information of the clones constructed in this study.

## Materials and Methods

### Cell culture

HEK293T cells were cultured using DMEM supplemented with 10% FBS, and 1% penicillin-streptomycin (Gibco). Transient transfection was performed with lipofectamine 2000 (Invitrogen) following manufacturer's instructions. For SILAC labeling of HEK293T cells, 50 mg of  $^{13}\text{C}_6$  L-Lys and 50 mg of  $^{13}\text{C}_6$   $^{15}\text{N}_4$  L-Arg were added to 0.5 liter of -Lys/-Arg SILAC DMEM (Thermo) supplemented with 10% FBS and 1% penicillin-streptomycin to generate "Heavy" medium. "Light" medium cells were cultured using DMEM supplemented with 10% FBS, and 1% penicillin-streptomycin.

### Construction of expression vectors

The protein sequences were downloaded from GenBank (Accession number: SARS-CoV-2 Orf9b MN908947.3, TOM70 NM\_014820.4, SARS-CoV Orf9b NP\_828859.1). According to the optimized genetic algorithm<sup>1</sup>, the amino acid sequences were converted into *E. coli* codon-optimized gene sequences. Subsequently, the sequences of optimized *E. coli* sequences and original gene sequences were synthesized by Sangon Biotech. (Shanghai, China). The synthesized genes were cloned into pET32a or pGEX-4T-1 and transformed into *E. coli* BL21 strain to construct the transformants. The genes without codon optimization were also synthesized and cloned into pcDNA3.1. All TOM70 variants were constructed by QuikChange® Site-Directed Mutagenesis Kit (Agilent Technologies). For the preparation of the biotinylated protein, the proteins were cloned with a C-terminal Avi-His6 tag into pET32a. Detailed information (the protein tags, the protein expression vectors, optimized gene sequences, and *etc.*) of the clones constructed in this study was given in **Supplementary Table 2**.

### Protein preparation

For preparation of the biotinylated proteins, the recombinant C-terminal Avi-His6 proteins and BirA were co-expressed in *E. coli* BL21 by growing cells in 200 mL LB medium to  $A_{600} = 0.6$  at 37 °C. Protein expression was induced by the addition of 0.2 mM isopropyl- $\beta$ -D-thiogalactoside (IPTG)

and 100  $\mu$ M D-biotin before incubating cells overnight at 16 °C. For the preparation of other proteins, the recombinant proteins were expressed in *E. coli* BL21 by growing cells in 200 mL LB medium to  $A_{600} = 0.6$  at 37 °C. Protein expression was induced by the addition of 0.2 mM isopropyl- $\beta$ -D-thiogalactoside (IPTG) before incubating cells overnight at 16 °C. For the purification of 6xHis-tagged proteins, cell pellets were re-suspended in lysis buffer containing 50 mM Tris-HCl pH 8.0, 500 mM NaCl, 20 mM imidazole (pH 8.0), then lysed by a high-pressure cell cracker (Union-biotech, Shanghai, CHN). Cell lysates were centrifuged at 12,000 rpm for 20 mins at 4°C. Supernatants were purified with Ni<sup>2+</sup> Sepharose beads (Smart-lifesciences, China), then washed with lysis buffer (For the purification of biotinylated protein, 1 mM biotin is added to the wash buffer) and eluted with buffer containing 50 mM Tris-HCl pH 8.0, 500 mM NaCl and 300 mM imidazole, pH 8.0. For the purification of GST-tagged proteins, cells were harvested and lysed by a high-pressure cell cracker in lysis buffer containing 50 mM Tris-HCl, pH 8.0, 500 mM NaCl, 1 mM DTT. After centrifugation, the supernatant was incubated with GST-Sepharose beads (Smart-lifesciences, China). The target proteins were washed with lysis buffer twice and eluted with 50 mM Tris-HCl, pH 8.0, 500 mM NaCl, 1 mM DTT, 40 mM glutathione.

### **Biotin-streptavidin affinity purification mass spectrometry**

Cells were harvested and lysed in M-PER<sup>®</sup> Mammalian Protein Extraction (Thermo) supplemented with 1 mM PMSF. Cells were incubated with Biotinylated Orf9b (Heavy medium) or control (light medium) and streptavidin Dynabeads (Invitrogen) for overnight at 4°C. The beads were then mixed at 1:1 ratio. The mixture was extensively washed with PBS buffer with 0.1% Triton X-100 for six times. Then the mixture was washed with 100 mM ammonium carboxylate. Trypsin (Promega) was used for on-bead trypsin digestion overnight at 37 °C. The digested peptides were collected and cleaned with ZipTips (Millipore) before mass spectrometry analysis. The tryptic peptide digests of the proteins were analyzed on an EASY-nL 1200 system coupled online to a Q Exactive plus mass spectrometer (Thermo Scientific, Bremen, Germany). The peptide sequences were determined by searching MS/MS spectra against the Protein database using the Protein Discoverer (version 2.4, Thermo Scientific) software suite with a precursor ion mass tolerance of 10 ppm and fragment ion mass tolerance of 0.02 Da. Carbamidomethyl (C) was set as

the fixed modification, oxidation (M) and deamidated(NQ) were set as the variable modification.

### **Co-immunoprecipitation and immunoblot analysis**

Cells were harvested at about 48 h after plasmid transfection and then lysed in M-PER<sup>®</sup> Mammalian Protein Extraction (Thermo) supplemented with 1 mM PMSF. Then cell lysates with/without Orf9b-Flag were used for immunoprecipitation with Flag Antibody (Millipore) and Protein G beads (Invitrogen). Generally, 1 µg primary antibody was added to 200 µL lysates with 50 µL Protein G Dynabeads (Invitrogen) for 4 h at 4°C. The beads were extensively washed with PBS buffer with 0.1% Triton X-100 and eluted with SDS loading buffer by boiling for 5 min. For immunoblot analysis, the samples were electrophorized using SDS-PAGE and transferred to a nitrocellulose membrane (Millipore). The membrane was probed with indicated antibody and scanned by a LI-COR Odyssey scanner (LI-COR Bioscience).

### ***In vitro* Streptavidin Pull-down Assays**

Biotinylated bait protein was incubated with candidate binding partners or BSA and streptavidin coated Dynabeads (Invitrogen) in PBS buffer for 4 h at 4°C. The beads were extensively washed with PBST buffer (0.1% Triton X-100) three times and boiled with SDS loading buffer for 5 min.

### **Luciferase reporter assays**

HEK 293T cells were seeded in 24-well plates. On the following day, cells were co-transfected with 200 ng of luciferase reporter plasmid, 20 ng of pRL-TK vector as a luciferase internal control, and the indicated expression vectors with Lipofectamine 2000 (Promega). Empty vector pcDNA3.1 was used to maintain equivalent amounts of DNA in each well. After cultured for 24 hrs, polyinosinic-polycytidylic acid [poly(I:C)] (Sigma) was transfected for 6 h. And cells were harvested to measure the expression of luciferase using a dual-luciferase reporter assay (Promega), using the Synergy<sup>™</sup> 2 Multi-Detection Microplate Reader (BioTeks). Each

experiment was replicated three times.

### **Immunofluorescence staining**

HEK293T cells were seeded on gelatin-coated coverslips and transfected with Flag-tagged empty vector, SARS-CoV Orf9b-Flag or SARS-CoV-2 Orf9b-Flag individually. Cells were fixed with 4% paraformaldehyde for 15 min, permeabilized with 0.1% Triton X-100 for 10 min and blocked with 0.5% BSA for 30 min. Cells were immunostained with anti-Flag antibody (Sigma) (1:100) , anti-TOM70 antibody (Proteintech) (1:100) and anti-TOM20 antibody (Abclonal) (1:100) or 500 nM MitoTracker® Orange CMTMRos (Thermo) overnight at 4 °C, followed by incubation with Alexa-488 conjugated anti-mouse antibody (Thermo) (1:1000) and Alexa-647 conjugated anti-rabbit antibody (Thermo) (1:1000) for 1 h. Then 4',6-diamidino-2-phenylindole (DAPI) was used to localize nucleus. Images were acquired with a confocal microscope (Nikon & A1Si).

### **Bio-layer Interferometry**

For the binding kinetics of SARS-CoV-2 Orf9b with TOM70 or TOM70<sub>235-608</sub>, biotinylated SARS-CoV-2 Orf9b was loaded at 25 ng/μL in kinetics buffer containing 1×PBS with 0.1% BSA and 0.02% Tween20 onto streptavidin biosensors (ForteBio). Association of TOM70 was tested in kinetics buffer at 62.5, 125, 250, 500, 1000 nM for 5 min, and the association of TOM70<sub>235-608</sub> was performed at 275, 550, 1100 nM for 5 min. Dissociation in kinetics buffer was measured for 5 min. For the binding kinetics of SARS-CoV Orf9b with TOM70, biotinylated SARS-CoV Orf9b was loaded at 25 ng/μL in kinetics buffer onto streptavidin biosensors (ForteBio). Association of TOM70 was performed in kinetics buffer at 75, 150, 300, 600, 1200 nM for 5 min. Dissociation in kinetics buffer was monitored for 5 min. BLI assays were carried out in 96-well black plates and analyzed on an OctetRed96 (ForteBio) equipment. Mean  $K_{on}$ ,  $K_{off}$ ,  $K_D$  values were calculated by a 1:1 global fit model using the Data Analysis software (ForteBio). All the curves were processed using Prism software (GraphPad Prism 6.0).

## References:

1. Chutrakul C, Jeennor S, Panchanawaporn S, et al. Metabolic engineering of long chain-polyunsaturated fatty acid biosynthetic pathway in oleaginous fungus for dihomogamma linolenic acid production. *J Biotechnol* 2016; **218**: 85-93.

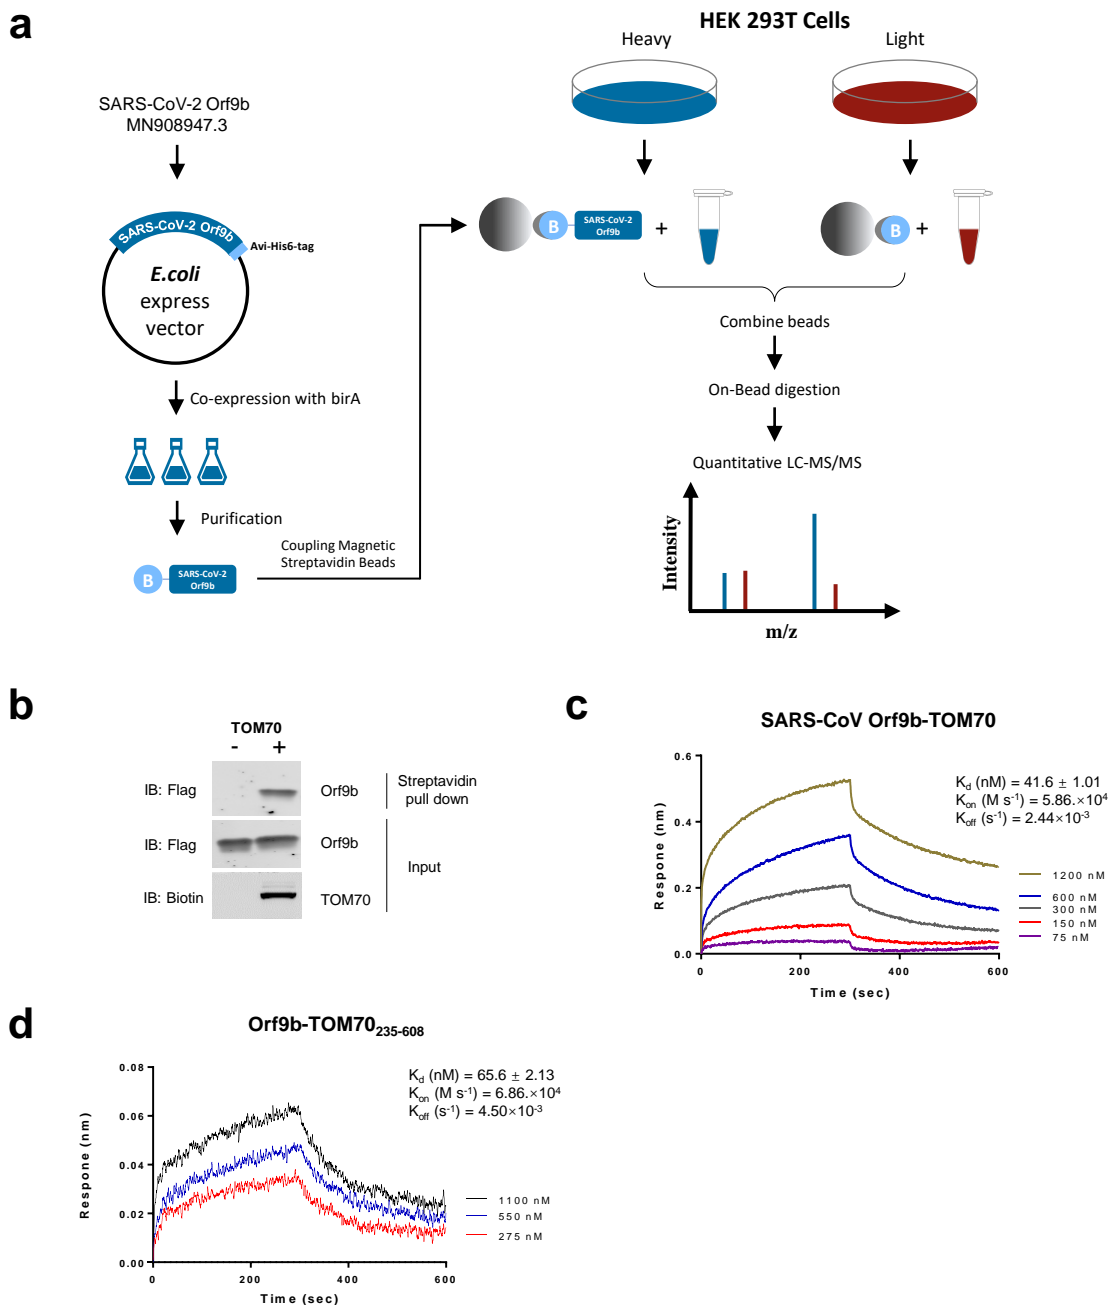

**Supplementary Fig. 1 Orf9b interacts with TOM70.** **a**, Workflow of Biotin-streptavidin affinity purification mass spectrometry. **b**, Streptavidin pull down assay was performed by biotinylated TOM70 incubated with BSA or Orf9b-Flag *in vitro*. **c-d**, BLI data for the binding of SARS-CoV Orf9b to TOM70 (**c**) or Orf9b to TOM70<sub>235-608</sub> (**d**) and their interaction kinetics. Biotinylated Orf9b was immobilized on streptavidin-coated biosensors and exposed to TOM70 in SD buffer ( $1 \times$  PBS, pH 7.4 with 0.02% Tween-20 and 0.1% BSA). Binding was measured by coincident changes in the interference pattern.

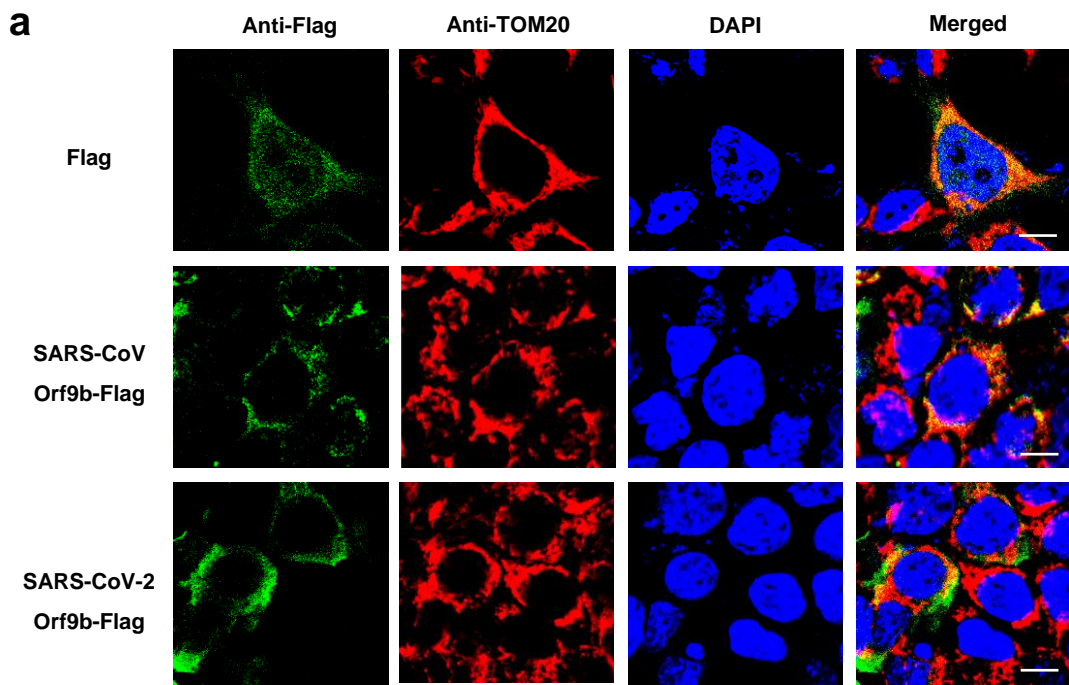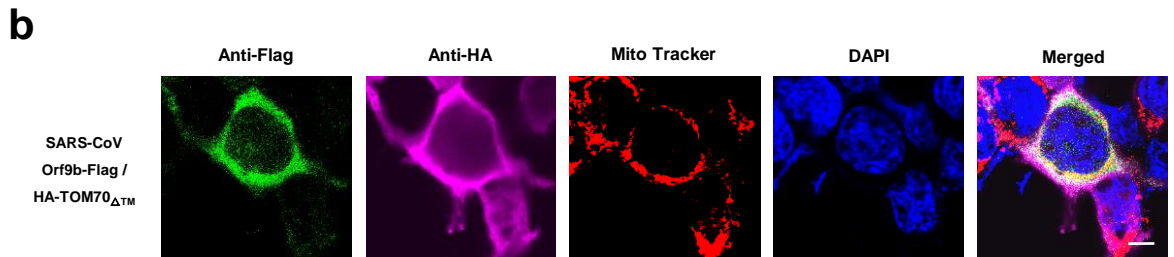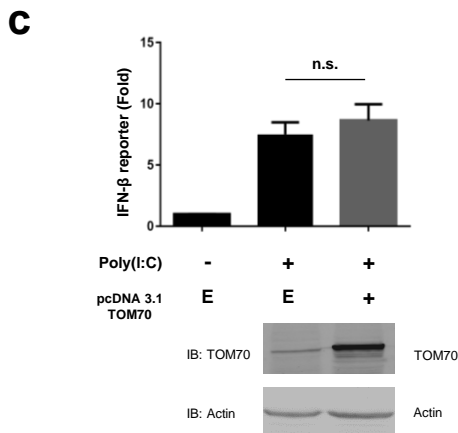

**Supplementary Fig. 2. Orf9b localizes on membrane of mitochondria and inhibits type I IFN responses through TOM70.** **a**, Confocal microscopy of HEK 293T cells transfected by SARS-CoV or SARS-CoV-2 Orf9b-Flag, which were stained with anti-flag antibody (green). The mitochondria were stained with TOM20 (red) and the nuclei were stained in blue using DAPI. Scale bar, 10  $\mu$ m. **b**, Confocal microscopy of HEK 293T cells transfected by SARS-CoV Orf9b-Flag and HA-TOM70 $\Delta$ TM, which were stained with anti-flag antibody (green) and anti-HA antibody (magenta). The mitochondria were stained with MitoTracker® Orange CMTMRos (Red) and the nuclei were stained in blue using DAPI. Scale bar, 10  $\mu$ m. **c**, IFN- $\beta$  reporter gene assays using HEK 293T cells expressing Flag or HA-TOM70 and induced by transfection of poly(I:C). Luciferase activity is shown as fold induction. Data are representative of three replicates (mean and s.e.m. of n=3 samples), n.s., not significant (two-tailed unpaired t-test). E, HEK 293T cells expressing Flag.



**Supplementary Table 1 The identified interacting protein list of SARS-CoV-2 Orf9b**

| Accession | Description                                      | Abundance Ratio:<br>(F1, Heavy Sample) /<br>(F1, Light Control) | Abundances<br>(Grouped): F1, Light<br>Control | Abundances<br>(Grouped):<br>F1, Heavy<br>Sample | PSMs | Unique<br>Peptides | # AAs | MW [kDa] |
|-----------|--------------------------------------------------|-----------------------------------------------------------------|-----------------------------------------------|-------------------------------------------------|------|--------------------|-------|----------|
| O94826    | Mitochondrial import<br>receptor subunit TOM70   | 11.594                                                          | 15.9                                          | 184.1                                           | 4    | 3                  | 608   | 67.4     |
| P29373    | Cellular retinoic acid-<br>binding protein 2     | 7.927                                                           | 22.4                                          | 177.6                                           | 3    | 3                  | 138   | 15.7     |
| P61224    | Ras-related protein Rap-<br>1b                   | 7.248                                                           | 24.2                                          | 175.8                                           | 4    | 3                  | 184   | 20.8     |
| Q96KR1    | Zinc finger RNA-binding<br>protein               | 7.705                                                           | 23                                            | 177                                             | 2    | 2                  | 1074  | 116.9    |
| P29966    | Myristoylated alanine-rich<br>C-kinase substrate | 2.152                                                           | 63.4                                          | 136.6                                           | 2    | 2                  | 332   | 31.5     |

**Supplementary Table 2. Detailed information of the clones constructed in this study**

| No. | Protein Name         | NCBI GenBank     | Vector    | Tag                    | Restriction sites | Expression System |
|-----|----------------------|------------------|-----------|------------------------|-------------------|-------------------|
| 1   | SARS-CoV Orf9b       | Optimized gene 1 | pET32a    | C-ter-Avi-His6         | NdeI/XhoI         | <i>E. coli</i>    |
| 2   | SARS-CoV-2 Orf9b     | Optimized gene 2 | pET32a    | C-ter-Avi-His6         | NdeI/XhoI         | <i>E. coli</i>    |
| 3   | TOM70                | Optimized gene 3 | pET32a    | C-ter-Avi-His6         | NdeI/XhoI         | <i>E. coli</i>    |
| 4   | SARS-CoV-2 Orf9b     | Optimized gene 1 | pET32a    | C-ter-Flag-His6        | NdeI/XhoI         | <i>E. coli</i>    |
| 5   | TOM70                | Optimized gene 3 | pGEX-4T-1 | N-ter-GST / C-ter-His6 | BamHI/XhoI        | <i>E. coli</i>    |
| 6   | Truncated TOM70      | Optimized gene 3 | pGEX-4T-1 | N-ter-GST / C-ter-His6 | BamHI/XhoI        | <i>E. coli</i>    |
| 7   | SARS-CoV Orf9b       | NP_828859.1      | pcDNA3.1  | C-ter-Flag             | HindIII/EcoRI     | HEK 293T          |
| 8   | SARS-CoV-2 Orf9b     | MN908947.3       | pcDNA3.1  | C-ter-Flag             | HindIII/EcoRI     | HEK 293T          |
| 9   | TOM70                | NM_014820.4      | pcDNA3.1  | N-ter-HA               | HindIII/EcoRI     | HEK 293T          |
| 10  | TOM70 <sub>ΔTM</sub> | NM_014820.4      | pcDNA3.1  | N-ter-HA               | HindIII/EcoRI     | HEK 293T          |

**Optimized gene sequences for *E. coli***

**Optimized gene 1. SARS-CoV Orf9b**

ATGGATCCGAACCAGACCAACGTTGTTCCGCCGGCGCTGCACCTGGTTGATCCGCAGATCCAGCTGACCATCACCCGTATGGAA  
 GATGCGATGGGCCAGGGCCAGAACAGCGCGGATCCGAAAGTTTACCCGATCATCTGCGTCTGGGCAGCCAGCTGAGCCTGAG  
 CATGGCGCGTGTAACTGGATAGCCTGGAAGCGCGTGCCTCCAGAGCACCCCGATCGTTGTTTCAGATGACCAAACTGGCGAC  
 CACCGAAGAACTGCCGGATGAATTCGTTGTTGTTACCGCGAAA

**Optimized gene 2. SARS-CoV-2 Orf9b**

ATGGACCCGAAAATCAGCGAAATGCACCCGGCGCTGCGTCTGGTTGATCCGCAGATCCAGCTGGCGGTTACCCGTATGGAAAAC  
 GCGGTTGGCCGTGATCAGAACAACGTTGGCCCGAAAGTTTACCCGATCATACTGCGTCTGGGTAGCCCGCTGAGCCTGAACATG  
 GCGCGTAAAACCTGAACAGCCTGGAAGATAAAGCGTTCCAGCTGACTCCGATCGCGGTTTCAGATGACCAAACTGGCGACCACC  
 GAAGAACTGCCGGATGAATTCGTTGTTGTTACCGTTAAA

**Optimized gene 3. TOM70**

ATGGCCGCTCTAAACCTGTGGAGGCAGCGGTGGTCCGACCCGCTGTACCGAGCTCCGGGAGTGGGGTGGGCGGCGGGCGGGA  
 CTGCGGGCCCGGACGGGGGGGCTGCCGCGATGGCAGCTGGCTCTGGCGGTCCGGGCACCCCTGCTGGGCGCGGGTG  
 CCATACCTGTGGAGTCGTGACGAGCGTGCCTGTAAGCGCGTGGTGGTGGTATGCGTCTGGCCCTGAAACGCAACTGTGAC  
 GCAAAACCCGGAAGGCCGTGCGTCCCGGCCACCGGGTAGCGGCCATCCGGAGGGTCCGGGCGCGCACCTGGATATGAACCTC  
 TCTGGACCGTGCACAGGCAGCGAAAAACAAAGTAAACAAATACTTCAAAGCAGGCAAATACGAACAGGCCATCCAGTGCTATAACC  
 GAAGCGATTAGCCTGTGCCGACCGAGAAAAACGTTGATCTGTCTACCTTCTATCAGAACCGTGCAGCGGGCTTCAACAGCTG  
 CAAAAATGGAAAGAAGTGGCGCAGGATTGACCAAAAGCTGTTGAACTGAACCCGAAATACGTTAAAGCGCTGTTCCGTCGTGCTA  
 AAGCACACGAAAAACTGGATAACAAAAAGAATGTCTCGAAGATGTTACCGCTGTTTGCATCCTGGAAGGCTTCCAGAACCAGCA  
 GTCCATGCTGCTGGCAGATAAAGTTCTGAAACTGCTGGGTAAGAAAAAGCGAAAGAAAAATATAAAACCGTGAACCACTGATG  
 CCGTCCCGCAGTTCATCAAATCTTACTTCTTTTACCGATGACATCATCAGCCAGCCGATGCTGAAAGGCGAAAAATCTGA  
 TGAAGATAAAGATAAAGAAGGTGAAGCGCTGGAAGTGAAGAAAACTCTGGTTACCTGAAAGCGAAACAGTACATGGAAGAAGAA  
 AACTACGATAAAATCATCTCTGAATGTAGCAAAGAAATCGACGCGGAAGGCAAATATATGGCTGAAGCGCTGCTGCTGCGTGCTA  
 CTTTCTACCTGCTGATCGGTAACGCGAACGCGGCTAAACCGGATCTGGATAAAGTTATCAGCCTGAAAGAAGCTAATGTGAAACT  
 GCGCGCTAACGCGCTGATCAAACGTGGCTCTATGTACATGCAACAGCAGCAGCCGCTGCTGTCTACCCAGGATTTCAACATGGC  
 GGCTGATATTGATCCGCAGAACGCGGATGTGTACCACCACCGTGGCCAGCTGAAAAATTCTGCTGGACCAGGTTGAAGAAGCAGT  
 TCGGATTTGATGAATGCATCCGCTGCTGCGTCCGGAATCCGCGCTGGCGCAGGCGCAGAAATGCTTTGCGCTGATCGTCAAGC  
 TTATACCGGTAACAACCTTCCCAGATCCAGGCGGCGATGAAAGGTTTCGAAGAAGTTATTAATAAAATTTCCCGCTTGTGCGGAA  
 GGCTACGCACTGTACGCTCAGGCGCTGACCGATCAGCAGCAGTTCCGGCAAAGCGGATGAAATGTACGATAAATGCATCGACCTG  
 GAACCGGATAACGCAACCACCTACGTTCAAAAGGTCTGCTGCAGCTGCAGTGGAAACAGGATCTGGATCGCGGCTGGAACCTG  
 ATCTCCAAAGCGATCGAAATCGATAACAAATGCGATTTTCGCGTATGAAACCATGGGCACCATCGAAGTTTCAGCGTGGCAACATGG  
 AAAAAGCTATTGACATGTTCAACAAAGCGATCAACCTGGCGAAAAGCGAAATGAAATGGCGCACCTGTATAGCCTGTGCGACGC  
 GGCTCACGCGCAGACCGAAGTGGCGAAAAATACGGCCTGAAACCGCCGACCCTG
